# Supplementary material for: Studies of synthesis, structural features of Cu(i) thiophene-2-thiocarboxylates and unprecedented desulfurization of Cu(ii) thiocarboxylate complexes
Source: Royal Society of Chemistry journal article supplement (doi:10.1039/c1dt10629e), 2011-10-25
Supplement: c1dt10629e.pdf [file c1dt10629e.pdf]

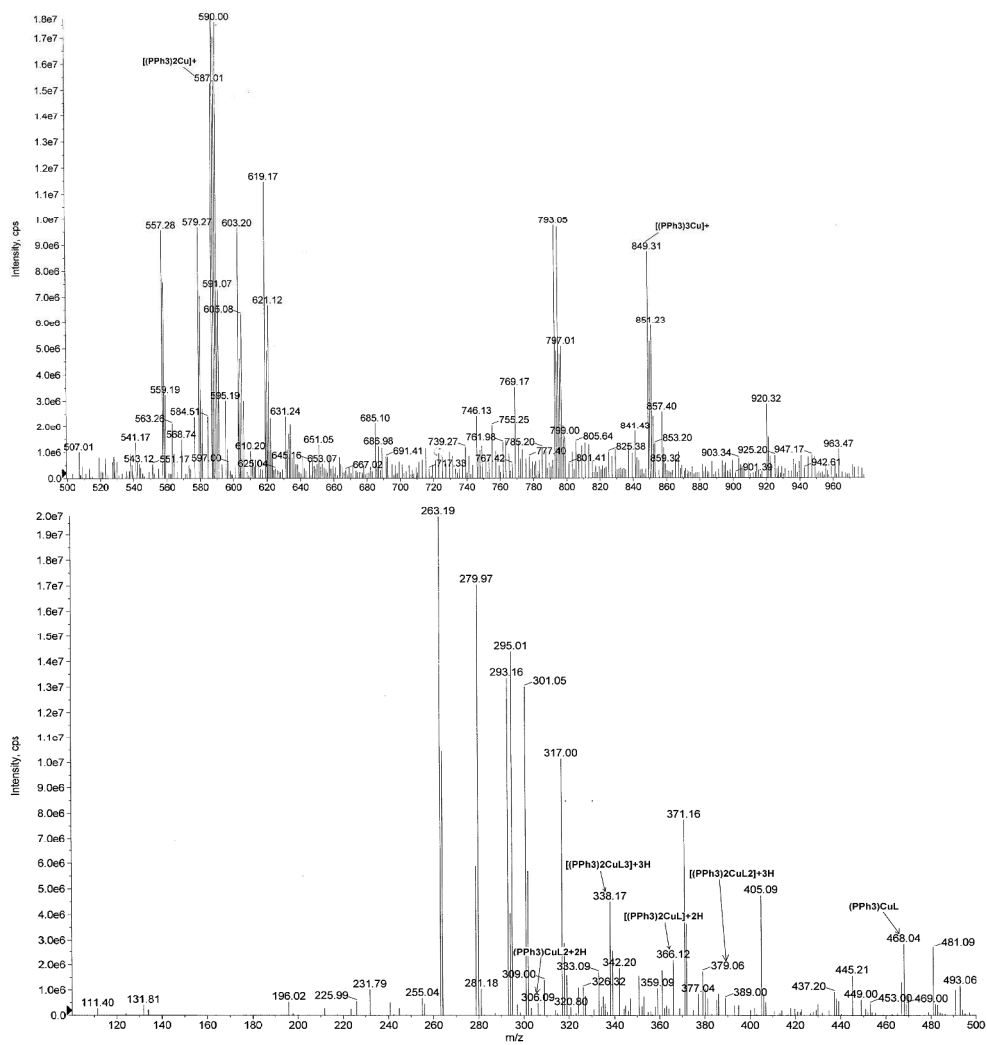

Figure S1. ES-Mass spectrum of **1**

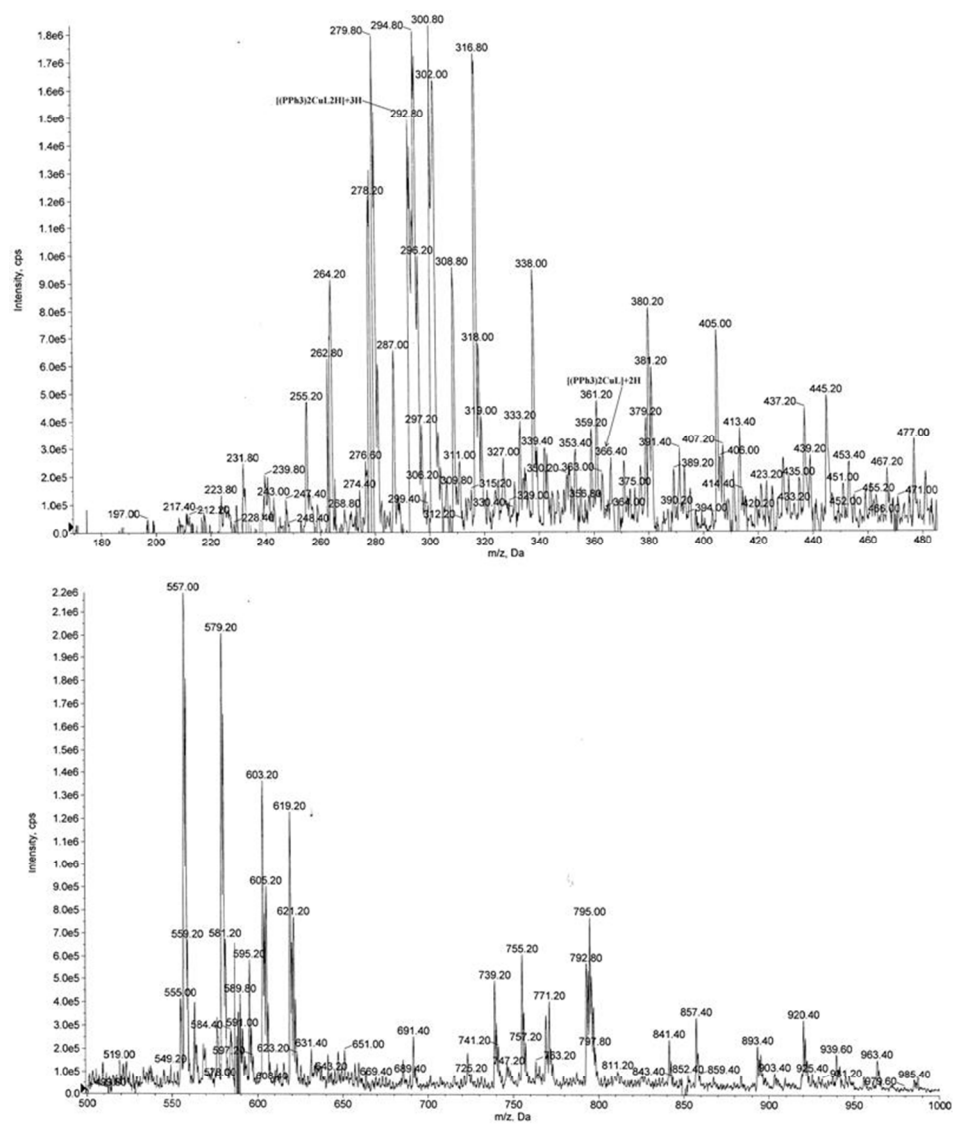

Figure S2. ESMass spectrum of **2**

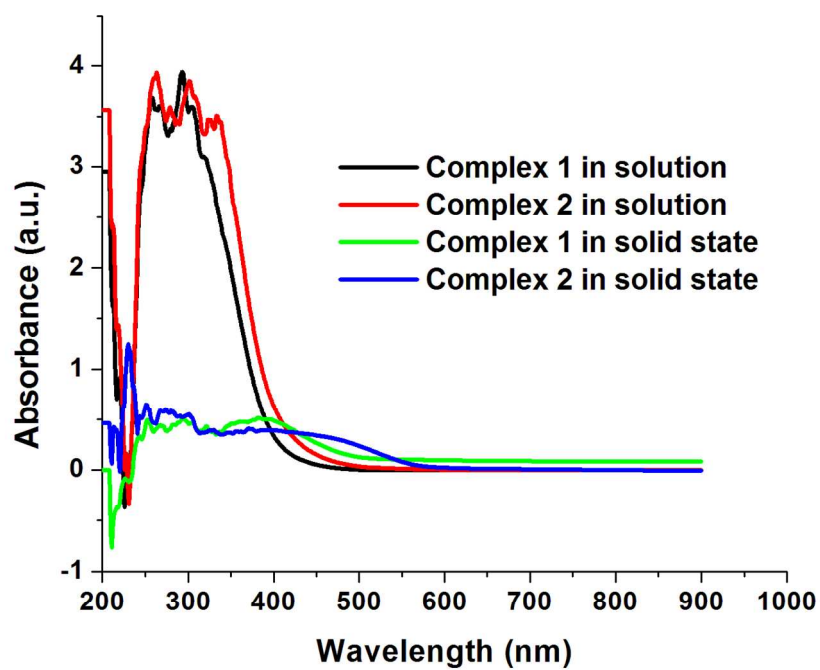

Figure S3. Absorption spectra of **1** and **2**.

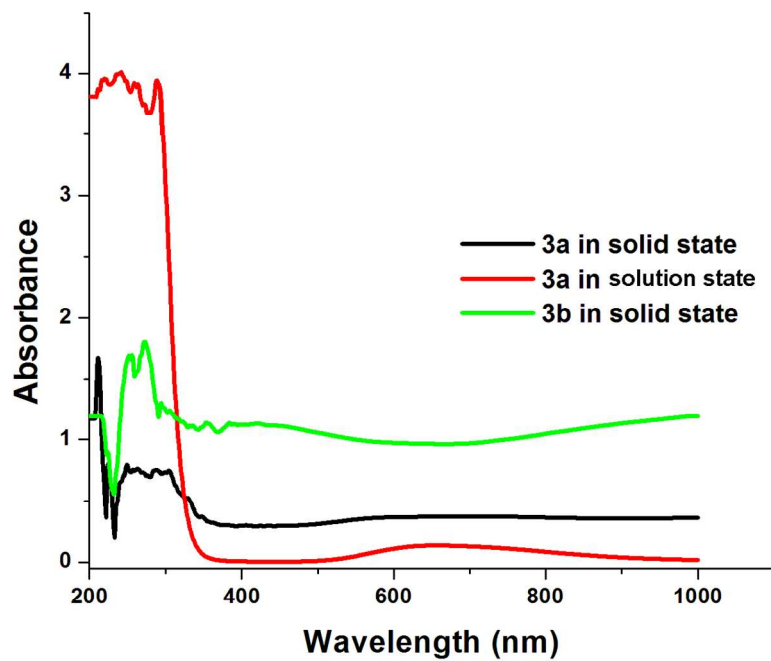

Figure S4. Absorption spectra of **3a** and **3b**.

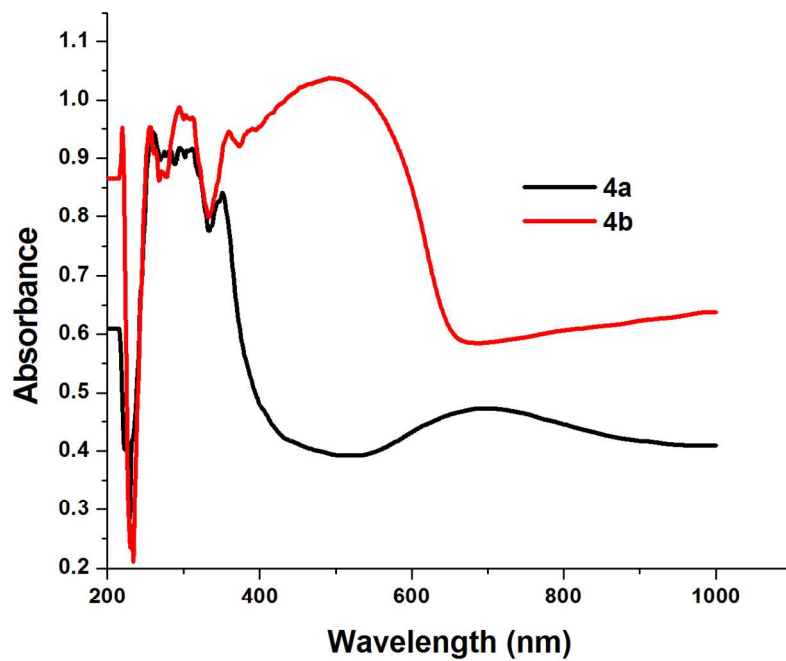

Figure S5. Absorption spectra of **4a** and **4b** in solid state.

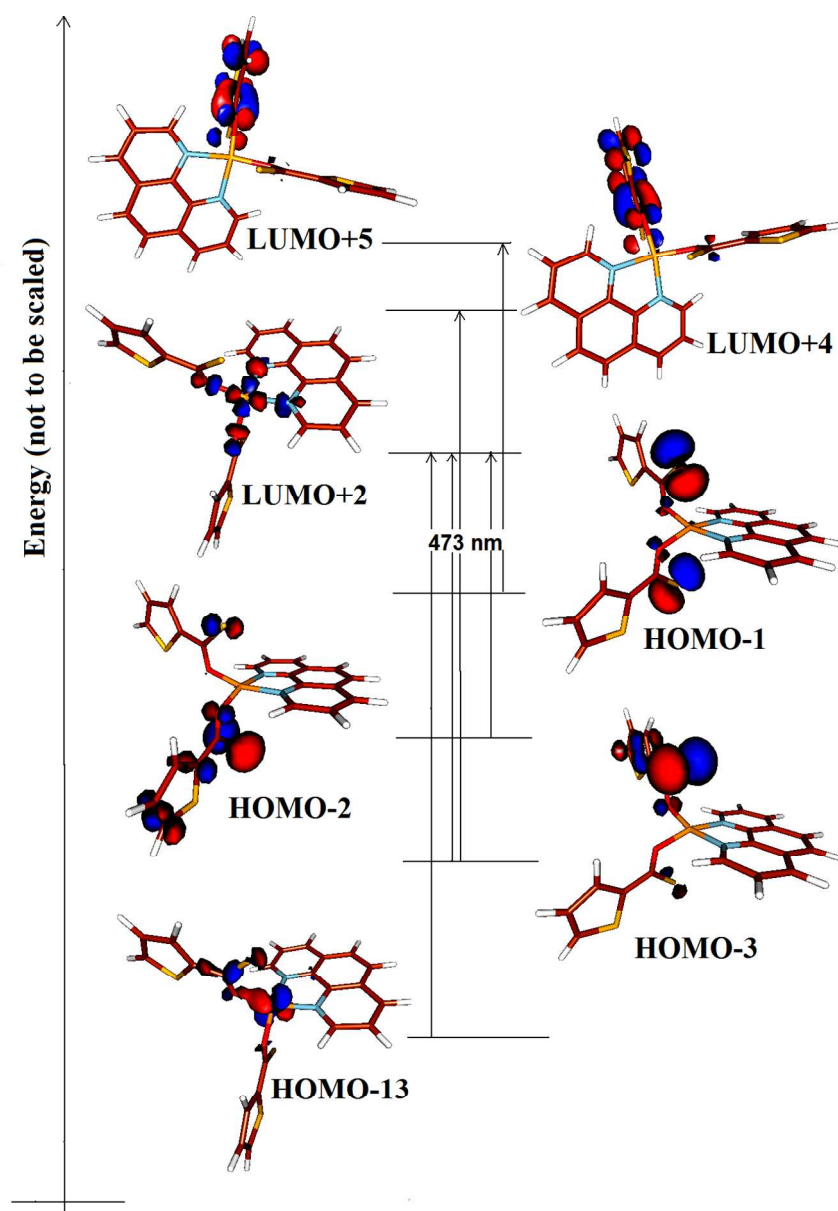

Figure S6. Selected transitions in **4a** (orbital contour value = 0.05)
